# Supplementary material for: Qualitative and quantitative investigation of organophosphates in an electrochemically and thermally treated lithium hexafluorophosphate-based lithium ion battery electrolyte by a developed liquid chromatography-tandem quadrupole mass spectrometry method
Source: Royal Society of Chemistry journal article supplement (doi:10.1039/c5ra23624j), 2015-12-15
Supplement: c5ra23624j1.pdf [file c5ra23624j1.pdf]

Table S1: Instrumental LODs of DMFP, DEFP, TMP and TEP for LC-MS/MS and GC-MS.

| Compound | LC-MS/MS  |                | GC-MS     |                |
|----------|-----------|----------------|-----------|----------------|
|          | LOD [ppm] | R <sup>2</sup> | LOD [ppm] | R <sup>2</sup> |
| DMFP     | 1.4       | 0.998          | 1.7       | 0.999          |
| DEFP     | 7.6       | 0.999          | 1.8       | 0.999          |
| TMP      | 0.1       | 0.992          | 0.9       | 0.999          |
| TEP      | 0.2       | 0.992          | 1.6       | 0.999          |

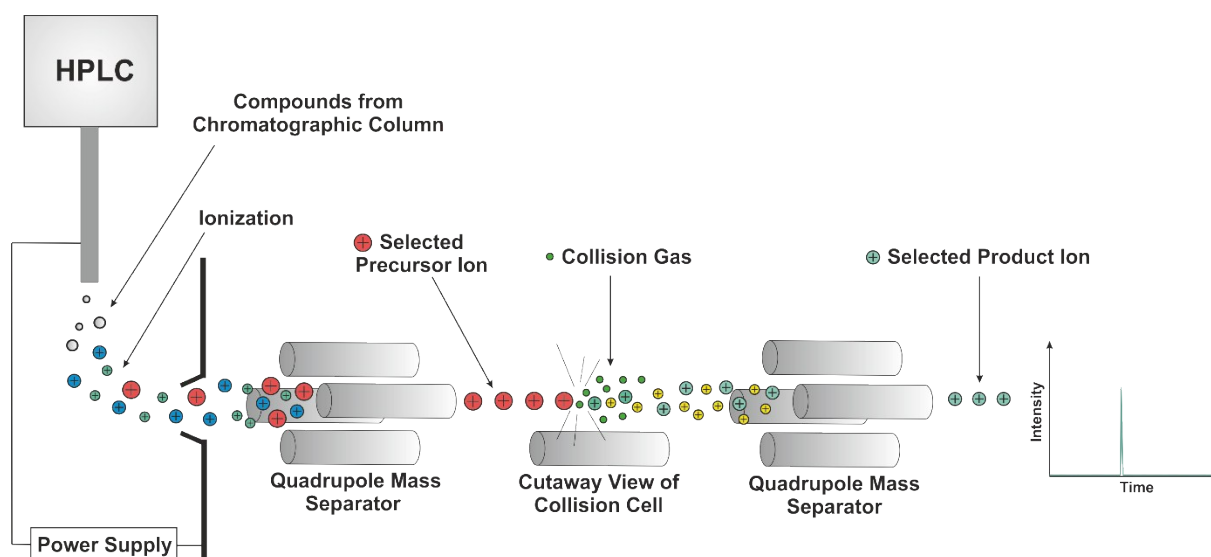

Figure S1: Schematic illustration of LC-MRM measurements.
